# Supplementary material for: Reverting TP53 Mutation in Breast Cancer Cells: Prime Editing Workflow and Technical Considerations
Source: MDPI journal article supplement (doi:10.3390/cells11101612), 2022-05-11
Supplement: s1 [file s1]

**Supplementary Table S1.** pegRNA and sgRNA sequences.

| Construct                           | Sequence (5'-3')                                                                                                                                                                           |
|-------------------------------------|--------------------------------------------------------------------------------------------------------------------------------------------------------------------------------------------|
| <i>TP53</i> T>C pegRNA              | ATCGGGTCTCACACCGATTCTCACTGATTGCTCTTGTTTTAGAGCTAGAAATA<br>GCAAGTTAAAATAAAGGCTAGTCCGTTATCAACTTGAAAAAGTGGCACCGAGTC<br>GGTGCAAGATGCTGAGGAGGGGCCAGACCTAAGAGCAATCAGTGAGGATTTTA<br>GAGACCCGAT     |
| <i>TP53</i> C>T pegRNA              | ATCGGGTCTCACACCGATTCTCACTGATTGCTCTTGTTTTAGAGCTAGAAATA<br>GCAAGTTAAAATAAAGGCTAGTCCGTTATCAACTTGAAAAAGTGGCACCGAGTC<br>GGTGCAAAAATGCTGAGGAGGGGCCAGACCTAAGAGCAATCAGTGAGGATTTTA<br>GAGACCCGAT    |
| <i>HEK</i> C>G pegRNA               | ATCGGGTCTCACACCGGGCCAGACTGAGCACGTGAGTTTTAGAGCTAGAAATAGC<br>AAGTTAAAATAAAGGCTAGTCCGTTATCAACTTGAAAAAGTGGGACCGAGTCGGTC<br>CTGGAGGAACCAGGGCTTCCTTTCCTCTGCCATCACGTGCTCAGTCTGTTTTAGAG<br>ACCCGAT |
| Top <i>TP53</i> nicking sgRNA       | CACCGCACGCAAATTTCTTCCACTGT                                                                                                                                                                 |
| Bottom <i>TP53</i> nicking sgRNA    | TAAACAGTGGAAGGAAATTTGCGTGC                                                                                                                                                                 |
| Top <i>HEK3+90</i> nicking sgRNA    | CACCGGTCAACCAGTATCCCGGTGCGT                                                                                                                                                                |
| Bottom <i>HEK3+90</i> nicking sgRNA | TAAACGCACCGGGATACTGGTTGACC                                                                                                                                                                 |

**Supplementary Table S2.** Primer sequences.

| Construct           | Sequence (5'-3')                    |
|---------------------|-------------------------------------|
| pegRNA PCR Fwd      | ATCGGGTCTCACACC                     |
| pegRNA PCR Rev      | ATCGGGTCTCTAAAA                     |
| <i>TP53</i> PCR Fwd | CACATGACGGAGGTTGTGAG                |
| <i>TP53</i> PCR Rev | GGGAGGTCAAATAAGCAGCA                |
| <i>HEK3</i> PCR Fwd | ATGTGGGCTGCCTAGAAAGG                |
| <i>HEK3</i> PCR Rev | GGTGCTGAAAGCCACTGGGC                |
| U6 promoter Fwd     | GAGGGCCTATTTCCCATGATTCC             |
| i5 Fwd adapter      | TCGTCGGCAGCGTCAGATGTGTATAAGAGACAG   |
| i7 Rev adapter      | GTCTCGTGCGGCTCGGAGATGTGTATAAGAGACAG |

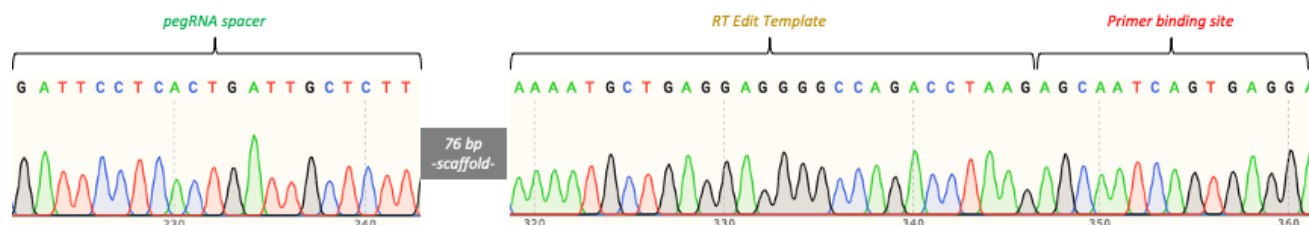

**Supplementary Figure S1.** Sanger sequencing verification of the ligated *TP53* C>T pegRNA in the pU6-pegRNA-GG-acceptor.

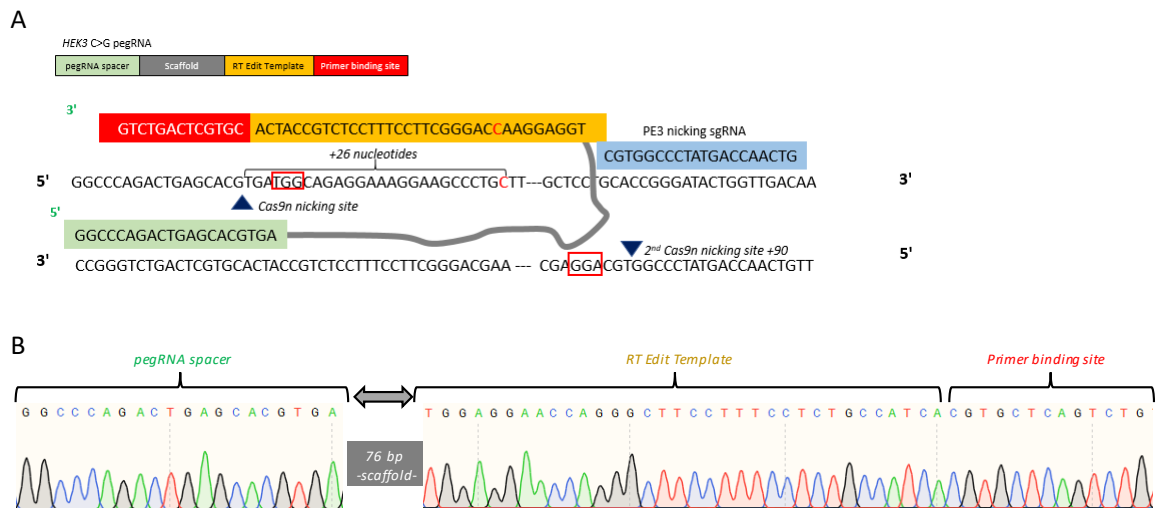

**Supplementary Figure S2.** *HEK3* C>G pegRNA and PE3. **(A)** Schematic of *HEK3* C>G pegRNA and PE3 sequence and their respective binding sites at the *HEK3* region. **(B)** Sanger sequencing verification of the ligated *HEK3* C>G pegRNA in the pU6-pegRNA-GG-acceptor.

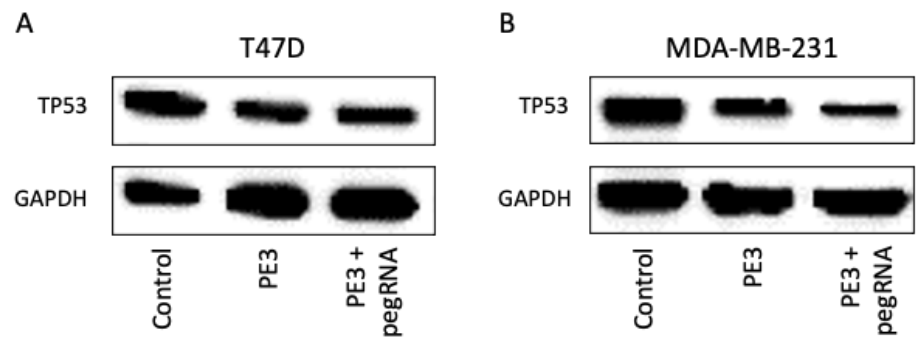

**Supplementary Figure S3.** Assessment of *TP53* T>C pegRNA and PE3 targeting efficiency. **(A,B)** The expression of TP53 protein in the **(A)** T47D and **(B)** MDA-MB-231 cells that expressed the wild-type Cas9 along with the indicated plasmids.

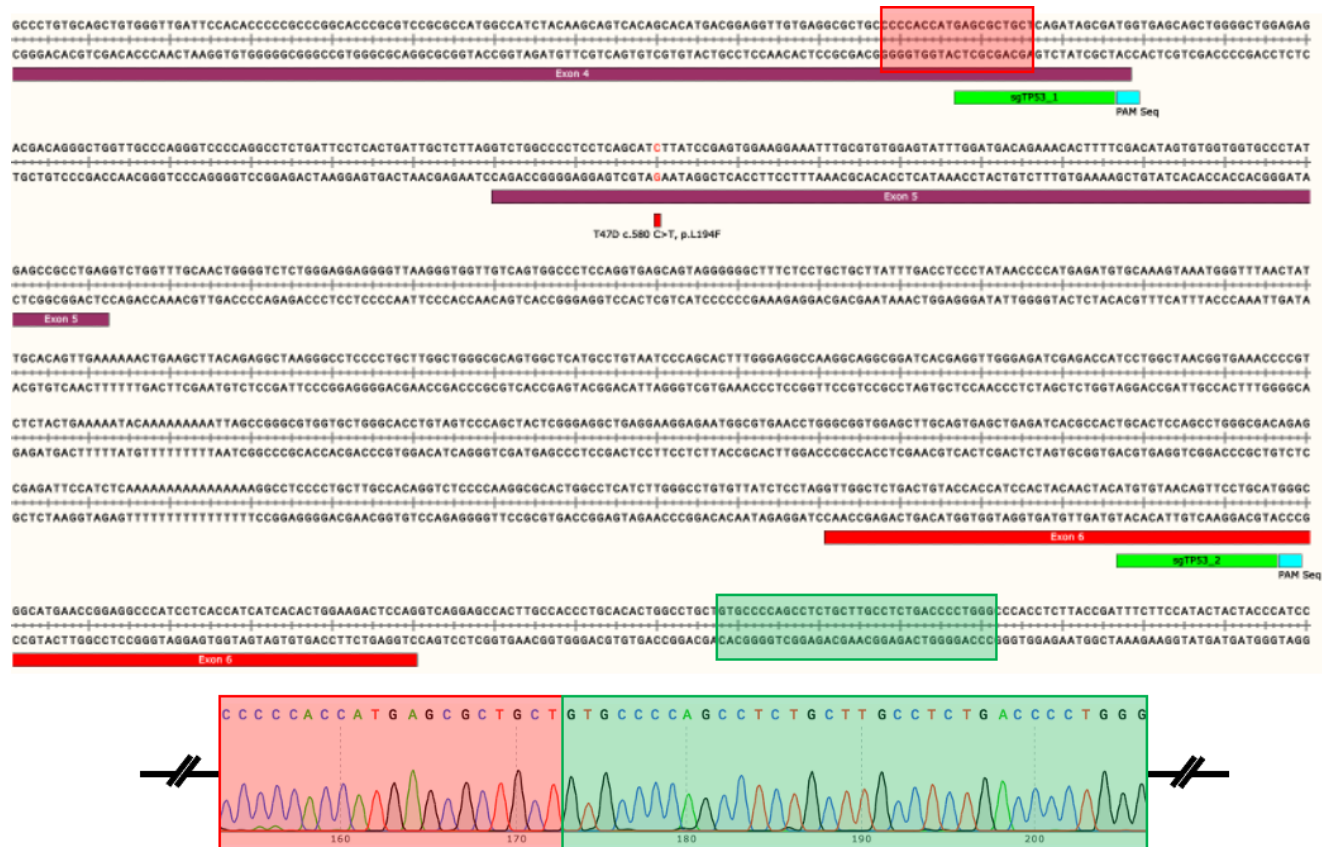

**Supplementary Figure S4.** Assessment of PE2 nicking activity in the HEK293T cells stably expressing sgTP53\_1 and sgTP53\_2. The respective location of the Sanger sequencing results within the *TP53* genomic locus is shown by the red and green boxes. There was a large genomic region deletion between the sgTP53\_1 cut site (red box) and around 90 base pairs upstream of the sgTP53\_2 PAM sequence (green box).

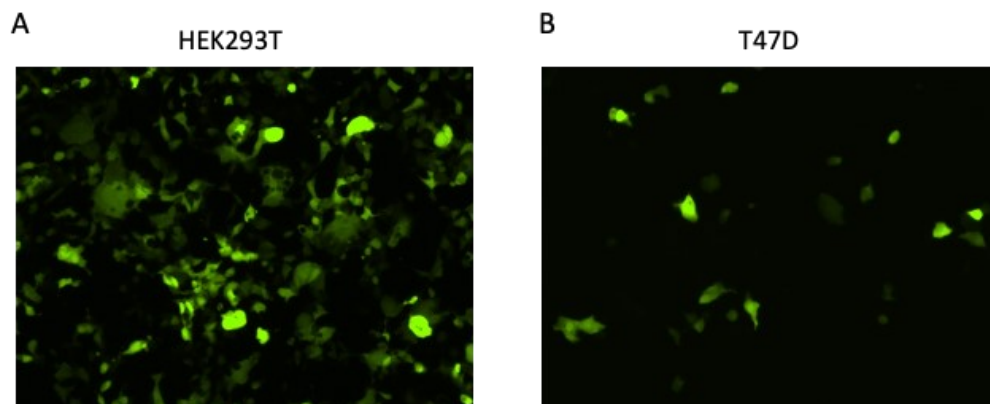

**Supplementary Figure S5.** Transfection protocol efficiency assessment. (A,B) Representative images of eGFP<sup>+</sup> (A) HEK293T and (B) T47D cells transfected with eGFP-encoded PE3 plasmid. (10X magnification.)
